# Supplementary material for: Antibody-powered DNA switches to initiate the hybridization chain reaction for the amplified fluorescence immunoassay
Source: Royal Society of Chemistry journal article supplement (doi:10.1039/d1an01045j), 2021-01-01
Supplement: d1an01045j1.pdf [file d1an01045j1.pdf]

## Electronic Supplementary Information

### **Antibody-powered DNA switches to initiate hybridization chain reaction for amplified fluorescence immunoassay**

Jia-Yang He, Ze-Hui Chen, Hui-Lin Deng, Ruo Yuan\* and Wen-Ju Xu\*

*Key Laboratory of Luminescence Analysis and Molecular Sensing (Southwest  
University), Ministry of Education, School of Chemistry and Chemical Engineering,  
Southwest University, Chongqing 400715, P. R. China.*

**Table S1.** Base sequences of oligonucleotides used in this work

| Names                   | Base sequence (5'→3')                                 |
|-------------------------|-------------------------------------------------------|
| Recognition strand (RS) | CAGTGGCGTTTTATTCTTGT-Dig                              |
| Report hairpin 1 (RH1)  | AGAATAAAACGCCACTGCCGAGCGATCGCCGCGCGG-Cy3              |
| Report hairpin 2 (RH2)  | AGAATAAAACGCCACTGCCGCGAAGCGATCGCCGCGCGCGCGG-Cy3       |
| Report hairpin 3 (RH3)  | AGAATAAAACGCCACTGCCGCGCGAAGCGATCGCCGCGCGCGCGCGCGG-Cy3 |
| Help strand 1 (HS1)     | AGAATAAAACGCCACTGATTTTTTTTTTTTTTTTTCTTCGGATCGCTT      |
| Help strand 2 (HS2)     | AGAATAAAACGCCACTGATTTTTTTTTTTTTTTTTCTTCGGCGATCGCTT    |
| Help strand 3 (HS3)     | AGAATAAAACGCCACTGATTTTTTTTTTTTTTTTTCTTCGCGGCGATCGCTT  |
| Quench hairpin 1 (QH1)  | TGTGGGCGATCGCTTCCGCG-BQH-2                            |
| Quench hairpin 2 (QH2)  | TGTCCGCGGCGATCGCTTCCGCGCG-BQH-2                       |
| Quench hairpin 3 (QH3)  | TGTCCGCGCGGCGATCGCTTCCGCGCGCG-BQH-2                   |

### Characterizations

Firstly, the hybridization reaction of different oligonucleotide samples was characterized using PAGE. From Fig. S1A, the individual RS, QH, RH and HS manifested their own characteristic mobility, separately corresponding to lane 1, 2, 3 and 4. While their mixture showed lower electrophoretic movement (lane 5), indicating the successful hybridization reaction between them. However, the addition of target anti-Dig in the above resultant solution caused several bands of different moving mobility (lane 6), where the slowest one standing in the uppermost

place might attribute to the HCR product by RH and QH base pairing in this assay system. Obviously, the production of HCR was much higher than DNA marker (lane 7) demonstrating that a DNA nanowire with a very high molecular weight was generated successfully.

Correspondingly, we also measured the UV-Vis absorption spectra of the above samples. Obviously from Fig. S1B, the weak absorptions of QH, RS, RH and HS were observed (curve 1-4). But for their mixture, a strong absorption peak was emerged (curve 5), and a similar UV-Vis response was also obtained after adding anti-Dig (curve 6), which might prove the efficient formation of more DNA double strands assisted by HCR.

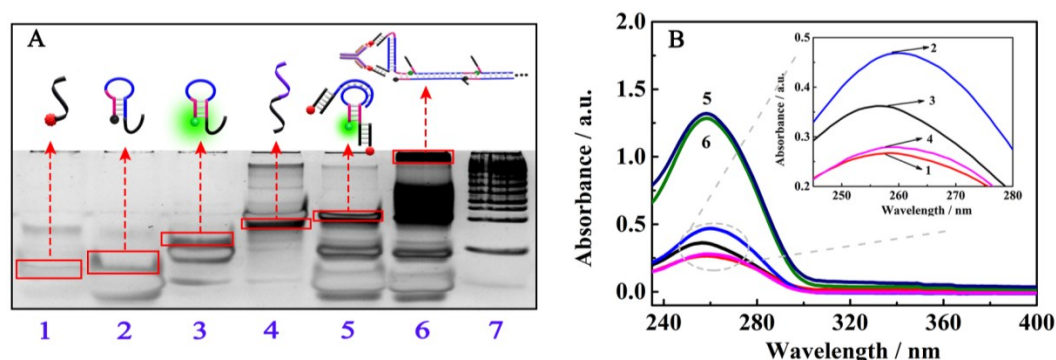

**Fig. S1** (A) PAGE image of RS (lane 1), QH (lane 2), RH (lane 3), HS (lane 4), RS+QH+RH+HS (lane 5), RS+QH+RH+HS+anti-Dig (lane 6) and DNA marker (25, 50, 75, 100, 150, 200, 300, 400, 500 bp) (7). All the samples (each with 2.0  $\mu$ M) were incubated at 37  $^{\circ}$ C for 2 h. (B) UV-Vis absorption spectra of QH (1), RS (2), RH (3), HS (4), QH+RS+RH+HS (5), QH+RS+RH+HS+anti-Dig (6)

### Optimization of reaction time

We investigated the effect of different reaction time in our detection system on the final BHQ-2-quenched fluorescence signal, mainly involving in the formation of the metastable DNA structure and the conjugation reaction of anti-Dig with two Dig

happens. Apparently from Fig. S2A, when mixing RS, HS and RH, the measured fluorescence (FL) intensity of Cy3 was gradually decreased with the increasing of reaction time from 0 to 2.5 h, and leveled off at about 2 h. Upon treated with anti-Dig in the resultant solution in 2.5 h, the fluorescence emission of Cy3 was efficiently quenched by BHQ-2, and the biggest extinction was firstly appeared at about 1.0 h (Fig. S2B), suggesting the optimal time of 1 h for anti-Dig coupling reaction.

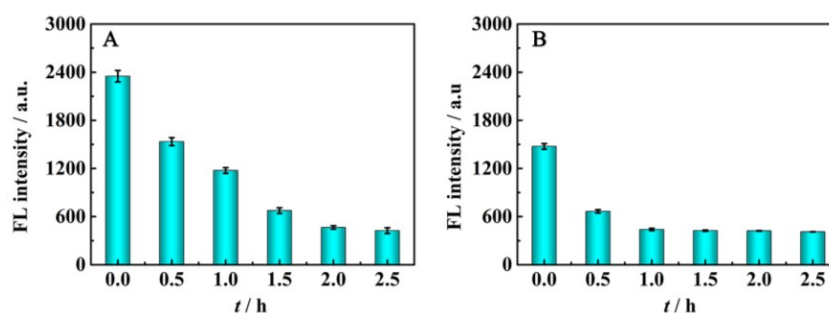

**Fig. S2** The fluorescence intensity of the detection system in different reaction time: (A) RS+HS+RH and (B) RS/HS/RH+anti-Dig. (The concentration of anti-Dig was 1  $\mu$ M. Error bars,  $s$ ,  $n=5$ ).

**Table S2** Detection strategies and analytical performance of different immunoassay methodologies.

| Methods    | Strategy                                        | Targets         | Linear range     | LOD     | Ref. |
|------------|-------------------------------------------------|-----------------|------------------|---------|------|
| CV and EIS | Paper-based electrochemical biosensor           | Anti-SARS-CoV-2 | 6.7 pM to 6.7 nM | 6.4 nM  | [1]  |
| DPASV      | Electrochemical immunoassay                     | Anti-Dengue     | 0 to 2.6 nM      | 0.68 nM | [2]  |
| ELISA      | Microfluidic-integrated multicolor immunosensor | Anti-HIV-1 p24  | 0 to 47 pM       | 3.3 pM  | [3]  |
| BL         | Thread-based bioluminescent sensor              | Anti-HIV1-p17   | 0 to 250 nM      | 7.7 nM  | [4]  |

|    |                                      |         |          |                 |        |          |
|----|--------------------------------------|---------|----------|-----------------|--------|----------|
| FL | Antibody-mediated molecule detection | small   | Anti-DNP | 30 to 200 nM    | 20 nM  | [5]      |
| FL | Antibody-powered switches integrated | DNA HCR | anti-Dig | 10 pM to 1.0 μM | 8.1 pM | Our work |

CV: cyclic voltammetry; EIS: electrochemical impedance spectroscopy; DPASV: differential pulse anodic stripping voltammetry; ELISA: enzyme linked immunosorbent assay; BL: bioluminescence.

**Table S3** Recovery of anti-Dig in human serum samples with our developed method ( $n=5$ ).

| Samples | Spiked (nM) | Measured (nM) | Recovery (%) | RSD (%) |
|---------|-------------|---------------|--------------|---------|
| 1       | 0.10        | 0.103         | 103          | 3.0     |
| 2       | 1.0         | 1.01          | 101          | 3.1     |
| 3       | 10          | 9.88          | 98.8         | 3.5     |
| 4       | 100         | 96.7          | 96.7         | 4.5     |

## References

- 1 A. Yakoh, P. Umaporn, S. Rengpipat, N. Hirankarn, O. Chailapakul, S. Chaiyo, *Biosens. Bioelectron.* 2021, **176**, 112912.
- 2 G. A. Ortega, J. C. Zuaznabar-Gardona and E. Reguera, *Biosens. Bioelectron.* 2018, **116**, 30-36.
- 3 D. Liu, Y. Q. Zhang, M. Y. Zhu, Z. Z. Yu, X. M. Ma, Y. L. Song, S. F. Zhou and C. Y. Yang, *Anal. Chem.* 2020, **92**, 11826-11833.
- 4 K. omimuro, K. Tenda, Y. Ni, Y. Hiruta M. Merkx, and D. Citterio, *ACS Sens.* 2020, **5**, 1786-1794.
- 5 M. Rossetti, R. Ippodrino, B. Marini, G. Palleschi and A. Porchetta, *Anal. Chem.* 2018, **90**, 8196-

8201.
